# Supplementary material for: An interlaboratory comparison to quantify oxidative potential measurement in aerosol particles: challenges and recommendations for harmonisation
Source: Copernicus journal article supplement (doi:10.5194/amt-18-177-2025), 2025-01-13
Supplement: Supplementary file 1 [file amt-18-177-2025-supplement.pdf]

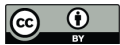

*Supplement of*

## **An interlaboratory comparison to quantify oxidative potential measurement in aerosol particles: challenges and recommendations for harmonisation**

**Pamela A. Dominutti et al.**

*Correspondence to:* Gaëlle Uzu ([gaelle.uzu@ird.fr](mailto:gaelle.uzu@ird.fr))

The copyright of individual parts of the supplement might differ from the article licence.

## SI-1 Simplified DTT RI-URBANS Protocol «Evaluation of acellular oxidative potential of particles by dithiothreitol (DTT) assay»

### Method 1 – OP DTT assay using plate readers

Before the absorbance measurements of the samples, perform a calibration of your analytical device using a DTT calibration curve for a concentration range between 0 and 60  $\mu\text{M}$  (titration with 1mM DTNB and reading of TNB formation at 412 nm) and report the results on the Excel file provided.

#### Reagents:

##### **Preparation of potassium phosphate (0.1M) buffer solution at pH 7.4**

Weigh 13.41 g of dipotassium phosphate ( $\text{K}_2\text{HPO}_4$ , CAS [7758-11-4]) and 3.13 g of potassium dihydrogen phosphate ( $\text{KH}_2\text{PO}_4$ , CAS [7778-77-0]) and mix them in a volumetric flask of 1000 mL with ultra-pure MilliQ water. Check the pH using a pH meter reading equal to  $7.4 \pm 0.1$ .

##### **Preparation of DTT mother solution (8.3 mM)**

Weigh 38.6 mg of 1,4-Dithiothreitol (DTT, CAS [3483-12-3]) and add 30 ml of the potassium phosphate buffer solution (7.4 pH). Keep the solution under an ice bath or in the fridge until use.

##### **Preparation of DTT daughter solution (0.25 mM)**

This solution is obtained from 1.20 mL of the 8.3 mM DTT solution and completed to a final volume of 40 ml with potassium phosphate buffer solution (7.4 pH). Keep the solution under an ice bath or in the fridge until use.

##### **Preparation of Dinitrothiobenzoic acid (DTNB) mother solution (10 mM)**

Weigh 118.8 mg of 5,5'-Dithiobis (2-nitrobenzoic acid) (DTNB, CAS [69-78-3]) and add 30 ml of the potassium phosphate buffer solution (7.4 pH). Keep the solution under an ice bath or in the fridge until use.

##### **Preparation of DTNB daughter solution (1 mM)**

This solution is obtained by diluting 4mL of the 10mM DTNB solution, completing a total volume of 40 mL with the potassium phosphate buffer solution (7.4 pH). Keep the solution under an ice bath or in the fridge until use.

##### **Particulate Matter suspension solutions to be tested - samples**

Solution SP1  $5.0 \mu\text{g mL}^{-1}$ , solution SP2  $25 \mu\text{g mL}^{-1}$ , Solution SP3  $25 \mu\text{g mL}^{-1}$ , solution SP4  $25 \mu\text{g mL}^{-1}$ .

For the extraction of PM suspension solution, the procedure followed the method suggested by Calas et al. (2017), which recommends 75 minutes of vortexing in Milli-Q water solutions.

#### Material

One transparent 96-wells plate is sufficient to process all the samples in triplicate. You can use a separate 96-wells for the calibration curve of DTT.

The samples need to be under agitation during the experiment time at  $37.4^\circ\text{C}$ .

An ice bath is required to keep the DTT and DTNB cold (at least keep the reagent solution fresh in the freezer until use)

59  
60  
61  
62  
63  
64  
65  
66**Procedure for plate readers automatically injected****DTT Exposure and DTNB analysis:****Set up the temperature of the plate reader at 37,4°C for the duration of the assay.**

1. Draw up a grid for 96-wells plate, and locate the samples SP1 to SP4 as in the table below, leaving the first 3x4 wells for the control<sub>ox</sub> (inherent DTT background oxidation).

|   | 1                     | 2                     | 3                     | 4   | 5   | 6   | 7   | 8   | 9   | 10  | 11  | 12  |      |
|---|-----------------------|-----------------------|-----------------------|-----|-----|-----|-----|-----|-----|-----|-----|-----|------|
| A | Control <sub>ox</sub> | Control <sub>ox</sub> | Control <sub>ox</sub> | SP1 | SP1 | SP1 | SP2 | SP2 | SP2 | SP3 | SP3 | SP3 | T=0  |
| B | Control <sub>ox</sub> | Control <sub>ox</sub> | Control <sub>ox</sub> | SP1 | SP1 | SP1 | SP2 | SP2 | SP2 | SP3 | SP3 | SP3 | T=10 |
| C | Control <sub>ox</sub> | Control <sub>ox</sub> | Control <sub>ox</sub> | SP1 | SP1 | SP1 | SP2 | SP2 | SP2 | SP3 | SP3 | SP3 | T=20 |
| D | Control <sub>ox</sub> | Control <sub>ox</sub> | Control <sub>ox</sub> | SP1 | SP1 | SP1 | SP2 | SP2 | SP2 | SP3 | SP3 | SP3 | T=30 |
| E | SP4                   | SP4                   | SP4                   |     |     |     |     |     |     |     |     |     | T=0  |
| F | SP4                   | SP4                   | SP4                   |     |     |     |     |     |     |     |     |     | T=10 |
| G | SP4                   | SP4                   | SP4                   |     |     |     |     |     |     |     |     |     | T=20 |
| H | SP4                   | SP4                   | SP4                   |     |     |     |     |     |     |     |     |     | T=30 |

67  
68  
69  
70  
71  
72  
73  
74  
75  
76  
77  
78  
79  
80  
81  
82  
83  
84  
85  
86  
87  
88  
89  
90  
91  
92  
93  
94  
95  
96  
97  
98  
99

2. Place 20  $\mu\text{L}$  of samples SP1 to SP4 into each well and 20  $\mu\text{L}$  of ultrapure water in Control<sub>ox</sub> wells.
3. Add 220  $\mu\text{L}$  of the potassium phosphate buffer solution (7.4 pH) in the sample wells SP1 to SP4 and in the control wells
4. Set up the plate reader at 37,4°C.
5. Place the plate into the reader and incubate for 10 minutes.
6. Shake the plate by the instrument for one minute.
7. **Read the intrinsic absorbance** of the samples/control at 412 nm.
8. At T= 0 min, program the injector A to dispense 50  $\mu\text{L}$  of 0.25 mM DTT in ALL wells. Keep the solution under an ice bath or in the fridge until use.
9. At T=0 min, program injector B to dispense 50  $\mu\text{L}$  of 1 mM DTNB into the T=0 wells (lines A and E). Keep the solution under an ice bath or in the fridge until use.
10. Shake the plate by the reader for 30 seconds every minute for 10 minutes.
11. At T=10 minutes, dispense 50  $\mu\text{L}$  of 1 mM DTNB into the T=10 wells (lines B and F) to stop the DTT consumption reaction by the samples.
12. Shake the plate by the device for 30 seconds every minute for 10 minutes.
13. At T=20 minutes, dispense 50  $\mu\text{L}$  of 1 mM DTNB into the T=20 wells (lines C and G).
14. Shake the plate by the device for 30 seconds every minute for 10 minutes.
15. At T=30 minutes, dispense 50  $\mu\text{L}$  of 1 mM DTNB into the T=30 wells (lines D and H).
16. Shake the plate for 60 seconds, wait 10 seconds and read the final absorbance at **412 nm**. The yellow compound (TNB) formed is stable for two hours; only one final absorbance measurement is necessary.
17. Calculate the kinetics of the DTT oxidation as:
  - nmol DTT  $\text{min}^{-1}$  is obtained by **subtracting both** the intrinsic absorption of each sample (to remove a potential matrix effect between samples, the value obtained in step 8) **and** the inherent DTT auto-oxidation rate (slope of Control<sub>ox</sub> sample) **from** the DTT consumption rate in the presence of particles (SP1-4).
  - nmol DTT  $\text{min}^{-1} \mu\text{g}^{-1}$  is obtained by subtracting both the intrinsic absorption of each sample and inherent DTT auto-oxidation rate from the DTT consumption rate in the presence of particles and dividing it by the mass of particulate matter in the reaction.
  - % DTT consumed  $\mu\text{g}^{-1} \text{min}^{-1}$  is obtained by the % of DTT lost over the reaction with samples relative to the inherent DTT auto-oxidation and normalised by the reaction time and per  $\mu\text{g}$  of PM.

## Simplified DTT RI-Urbans Protocol – CNRS

100 All these formulae are pre-included in the Excel spreadsheet provided, following the equation  
101 1;

$$102 \quad \Delta DTT_t \text{ (nmol min}^{-1}\text{)} = \frac{V}{\Delta t} \left( \frac{(A_t - A_{t0})}{k} \right) - \Delta DTT_{a.o.r} \quad \text{Equation 1}$$

103 Where V is the volume of the DTT solution for which absorbance measurement is taken;  $\Delta t$  is  
104 the incubation time (e.g., 10, 20, 30 min),  $A_t$  is final absorbance reading for  $T = t$  min incubation  
105 experiment;  $A_{t0}$  is the intrinsic absorption of each sample,  $k$  is the calibration slope of  
106 absorbance vs concentration of DTT, and  $\Delta DTT_{a.o.r}$  is the inherent DTT auto-oxidation rate  
107 (slope of Controlox sample).

108 Use the Excel spreadsheet to add the results using your participant reference number, the  
109 analytical protocol and instrument used and the reference number for each sample.

110  
111 Once you have reported results for the DTT simplified protocol, feel free to test the samples  
112 with your own protocols, filling the other tabs of the Excel file.

113  
114

### 115 **Procedure for plate readers without injectors**

#### 116 **DTT Exposure and DTNB analysis:**

117 **Set up the temperature of the plate reader at 37.4°C for the duration of the assay.**

118

- 119 1. Draw up a grid for 96-wells plate, and locate the samples SP1 to SP4 as in the table above,  
120 leaving the first 3x4 wells for the control sample (inherent DTT background oxidation).
- 121 2. Place 20  $\mu\text{L}$  of samples SP1 to SP4 into each well and 20  $\mu\text{L}$  of ultrapure water in Control<sub>ox</sub> wells.
- 122 3. Add 220  $\mu\text{L}$  of the potassium phosphate buffer solution (7.4 pH) in the sample wells SP1 to SP5  
123 and in the control sample wells.
- 124 4. Introduce the plate into the reader and read the intrinsic absorbance of the solutions at 412  
125 nm.
- 126 5. Inject 50  $\mu\text{L}$  of 1mM DTNB into the  $T=0$  min wells (lines A and E) (this is done to avoid depletion  
127 of DTT with samples at  $t=0$  with manual injection, which is slower than injectors). Keep the  
128 DTNB solution under an ice bath or in the fridge until use.
- 129 6. Dispense 50  $\mu\text{L}$  of 0.25 mM DTT in ALL wells. Keep the DTT solution under an ice bath or in the  
130 fridge until use.
- 131 7. Set up the plate reader at 37.4 °C.
- 132 8. Introduce the plate into the plate reader and incubate for 10 mins.
- 133 9. Shake the plate by the device for 30 seconds every minute for 10 minutes.
- 134 10. At  $T=10$  minutes, remove the plate from the instrument and inject 50  $\mu\text{L}$  of 1mM DTNB into  
135 the  $T=10$  wells (lines B and F) to stop the DTT consumption reaction by the samples.
- 136 11. Place the plate back on the reader and stir it for 30 seconds every minute for 10 minutes.
- 137 12. At  $T=20$  minutes, remove the plate from the reader and inject 50  $\mu\text{L}$  of 1mM DTNB into the  
138  $T=20$  wells (lines C and G).
- 139 13. Place the plate back on the reader and shake it for 30 seconds every minute for 10 minutes.
- 140 14. At  $T=30$  minutes, remove the plate from the reader and dispense 50  $\mu\text{L}$  of 1mM DTNB into the  
141  $T=30$  wells (lines D and H).
- 142 15. Place the plate back into the reader and shake it for 60 seconds, wait 10 seconds and read the  
143 final absorbance at **412 nm**. The yellow compound (TNB) formed is stable for two hours; only  
144 one final absorbance measurement is necessary.
- 145 18. Calculate the kinetics of the DTT oxidation as:

- 146 - nmol DTT min<sup>-1</sup> is obtained by **subtracting both** the intrinsic absorption of each sample (to  
 147 remove a potential matrix effect, value obtained in step 8) **and** the inherent DTT auto-oxidation  
 148 rate of the blank (slope of Control<sub>ox</sub> sample) **from** the DTT consumption rate in the presence of  
 149 particles (SP1-4).  
 150 - nmol DTT min<sup>-1</sup> μg<sup>-1</sup> is obtained by subtracting both the intrinsic absorption of each sample and  
 151 inherent DTT auto-oxidation rate from the DTT consumption rate in the presence of particles  
 152 and dividing it by the mass of particulate matter in the reaction.  
 153 - % DTT consumed μg<sup>-1</sup> min<sup>-1</sup> is obtained by the % of DTT lost over the reaction with samples  
 154 relative to the inherent DTT auto-oxidation and normalised by the reaction time and per μg of  
 155 PM.

156 All these formulae are pre-included in the Excel spreadsheet provided, following the equation  
 157 1;

$$\Delta DTT_t \text{ (nmol min}^{-1}\text{)} = \frac{V}{\Delta t} \left( \frac{(A_t - A_{t0})}{k} \right) - \Delta DTT_{a.o.r} \quad \text{Equation 1}$$

159 Where V is the volume of the DTT solution for which absorbance measurement is taken; Δt is  
 160 the incubation time (e.g., 10, 20, 30 min), A<sub>t</sub> is final absorbance reading for T= t min incubation  
 161 experiment; A<sub>t0</sub> is the intrinsic absorption of each sample, k is the calibration slope of  
 162 absorbance vs concentration of DTT, and ΔDTT<sub>a.o.r</sub> is the inherent DTT auto-oxidation rate  
 163 (slope of Control<sub>ox</sub> sample).

164 Use the Excel spreadsheet to add the results using your participant reference number, the  
 165 analytical protocol and instrument used and the reference number for each sample.

166  
 167 Once you have reported results for the DTT simplified protocol, feel free to test the samples  
 168 with your own protocols, filling the other tabs of the excel file.

169

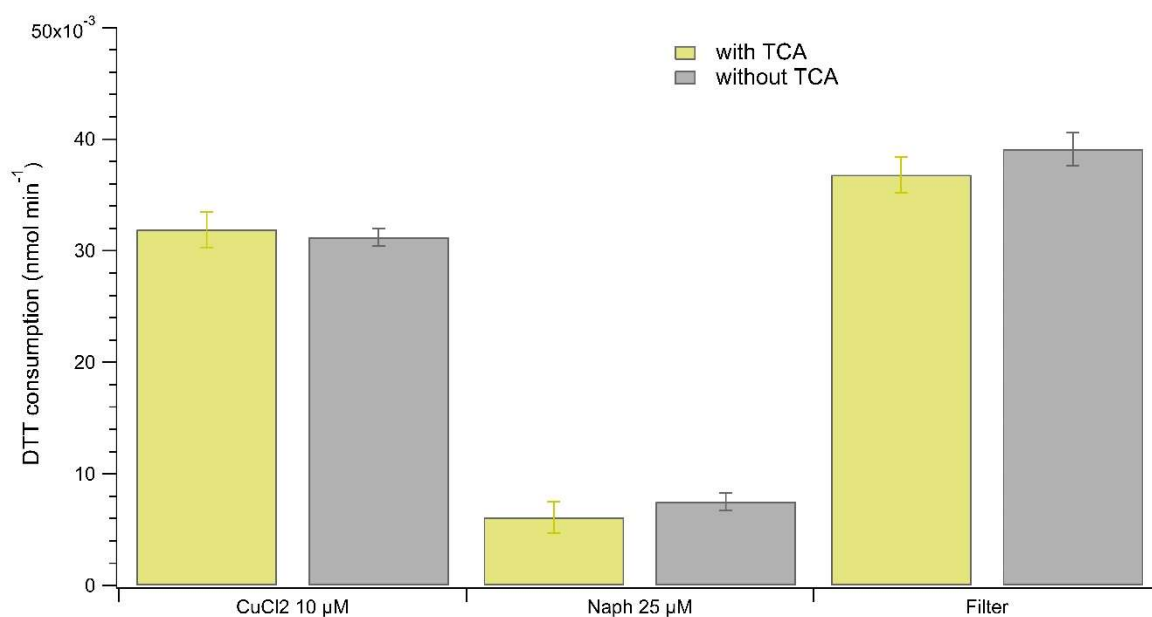

170

171 *Figure S1. The effect of trichloroacetic acid (TCA; used for quenching the DTT reaction mixture) on the measured*  
172 *OP DTT values (in nmol min<sup>-1</sup>). The experiments were conducted using CuCl<sub>2</sub> (10 μM), 1,4-naphthoquinone (Naph;*  
173 *25 μM), and aqueous extracts of ambient PM samples (filter).*

174

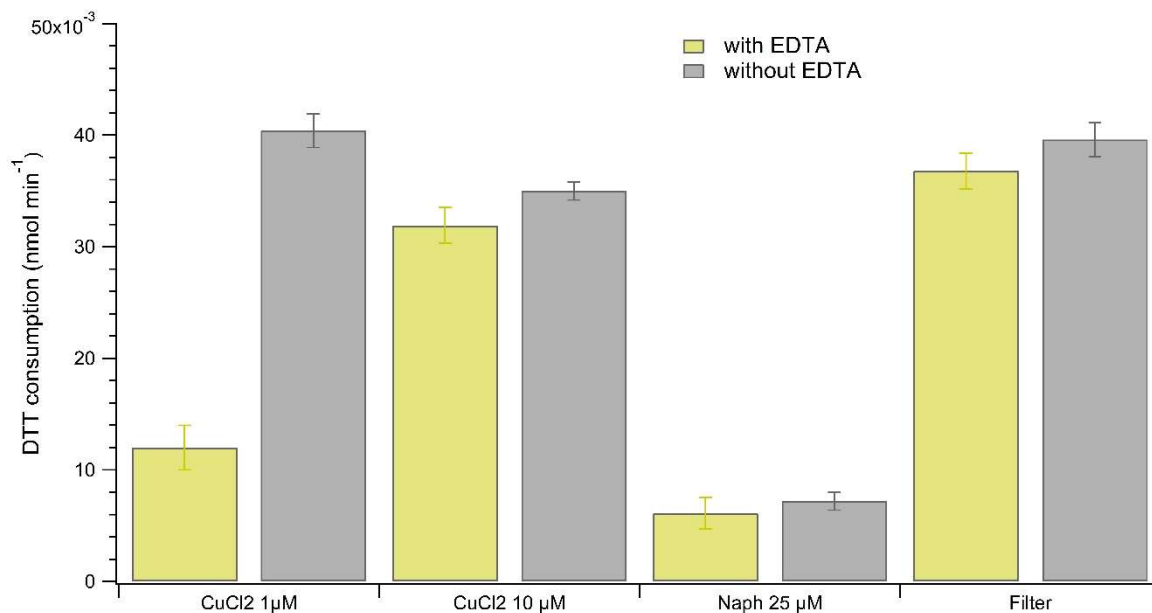

175

176 *Figure S2. The average effect and standard deviation of EDTA (used for buffer purification) on the measured OP*  
177 *DTT values (in nmol min<sup>-1</sup>). The experiments were conducted using CuCl<sub>2</sub> (1 μM and 10 μM), 1,4-naphthoquinone*  
178 *(Naph; 25 μM), and aqueous extracts of ambient PM samples (filter).*

179

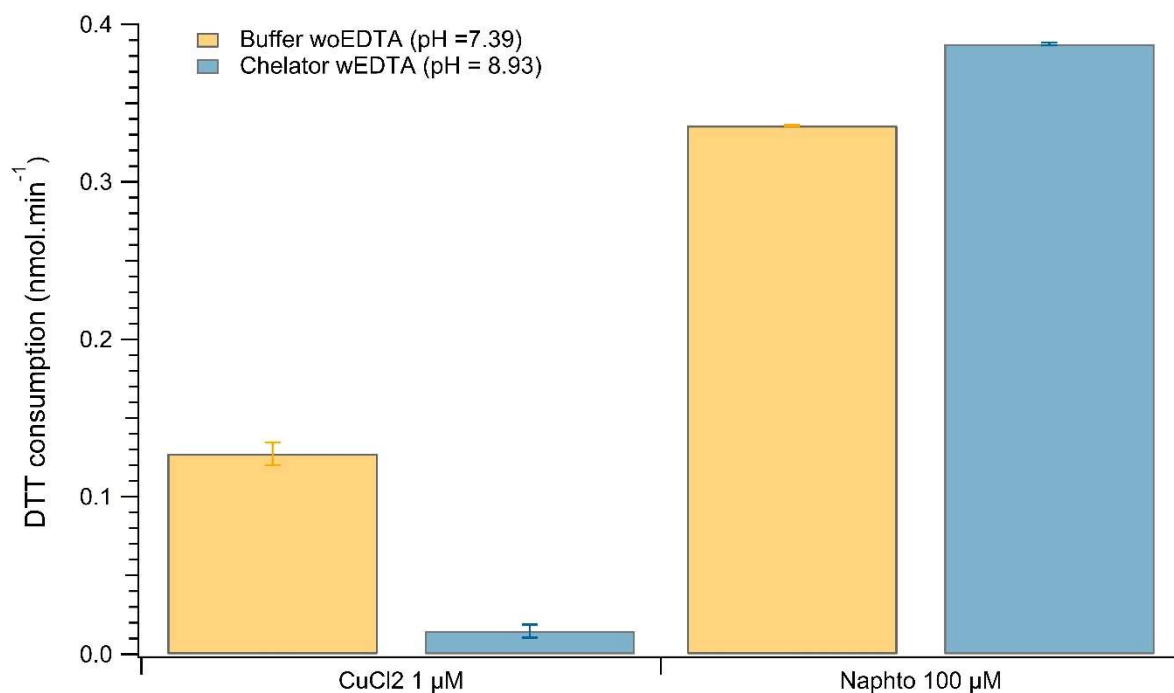

180

181 *Figure S3. Comparison of the average effect and standard deviation of potassium phosphate buffer (pH= 7.4)*  
 182 *without EDTA (yellow bars) and the Tris-HCl buffer with EDTA (pH= 8.9) on the measured OP DTT values (in nmol*  
 183 *min<sup>-1</sup>). The experiments were conducted using CuCl<sub>2</sub> (1 μM), and 1,4-naphthoquinone (Naph; 100 μM) samples.*

184

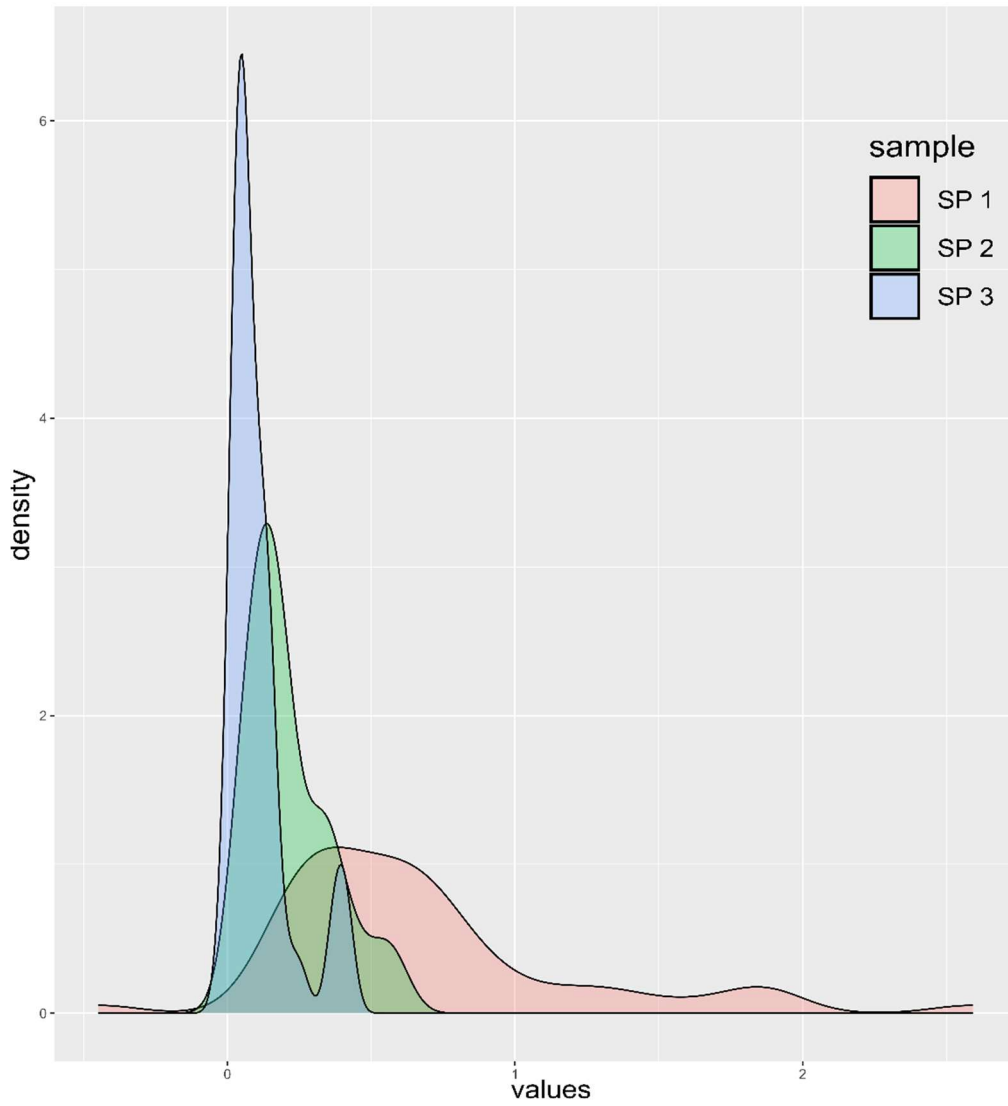

185  
186 *Figure S4. Density plots presenting the distribution of values for each sample applying the RI-URBANS DTT SOP.*  
187  
188  
189  
190  
191  
192  
193



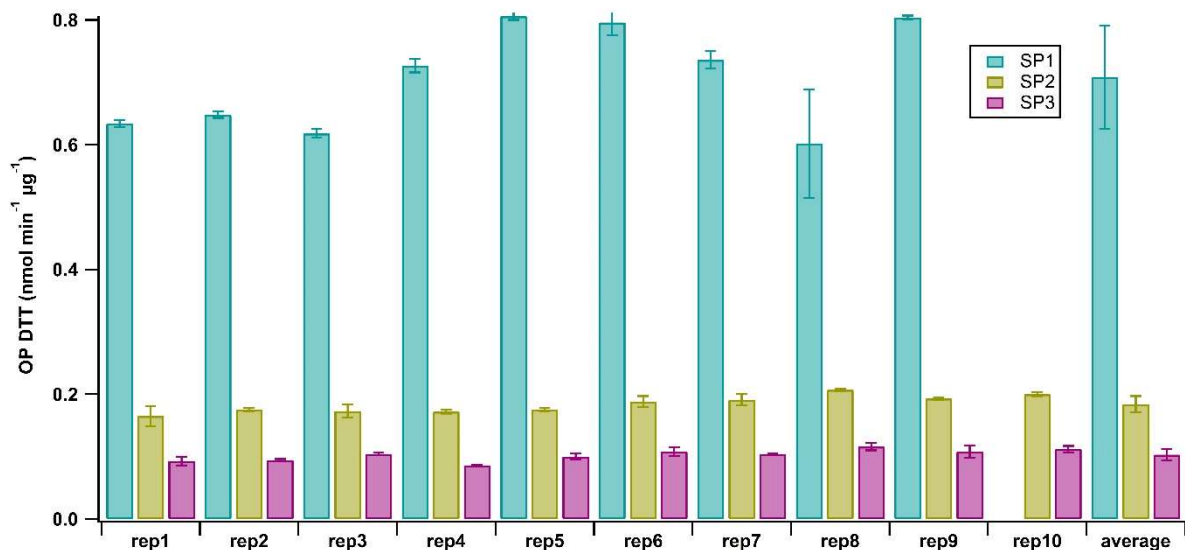

194

195 *Figure S5. Homogeneity test results (average and standard deviation) obtained from the measurements of each*  
 196 *sample replicates (n=10 for each sample). SP1 = 1,4 naphthoquinone solution, SP2 = biomass burning emissions*  
 197 *sample and SP3 = traffic emissions sample.*

198

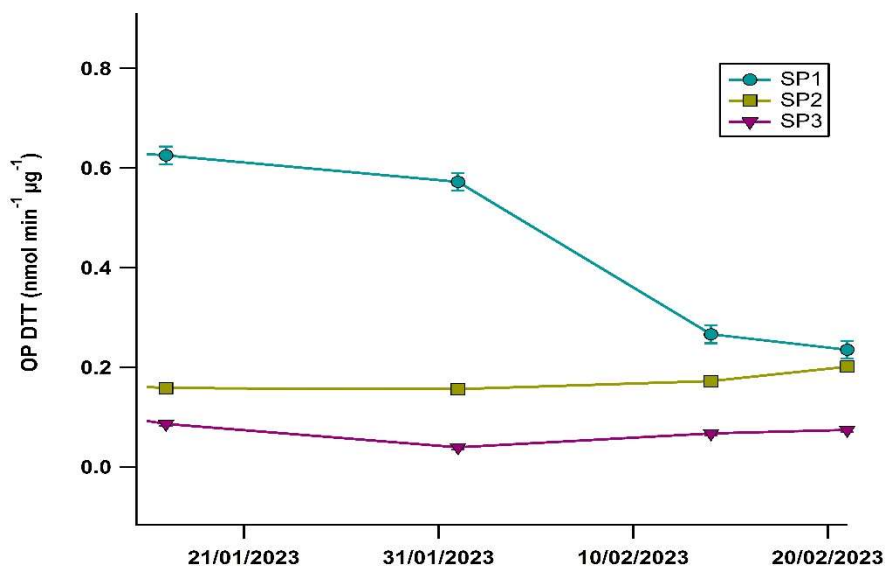

199

200 *Figure S6. Results of the OP DTT of each sample (average and standard deviation obtained from the*  
 201 *homogenization test) over time following the simplified RI-URBANS DTT SOP. The analyses were performed by the*  
 202 *ILC organiser.*

203

204

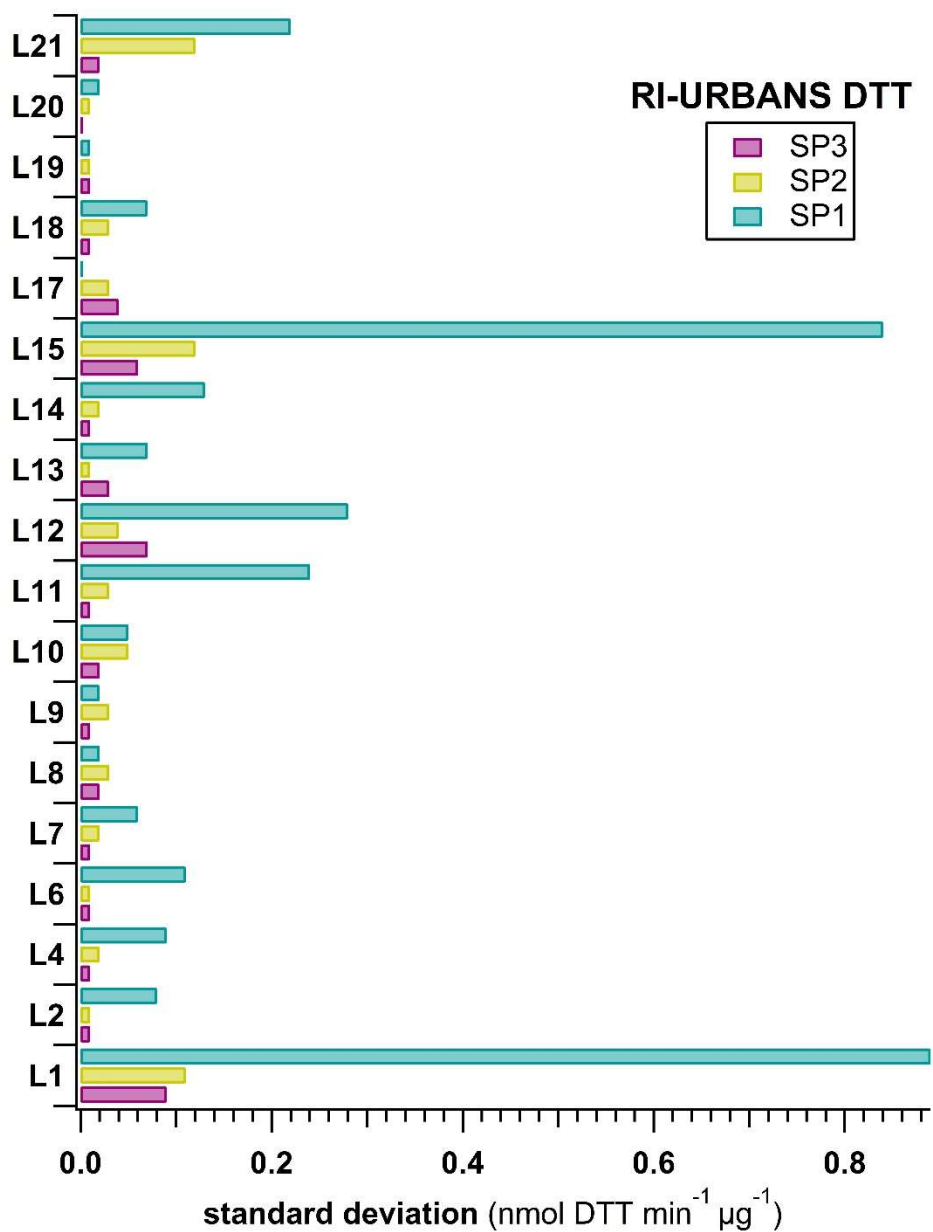

205

206 *Figure S7. Standard deviation on the replicates reported for each test sample using the RI-URBANS DTT SOP,*  
 207 *grouped by participant reference number.*

208

209

210 *Table S1. The average and standard deviation (in nmol min<sup>-1</sup> µg<sup>-1</sup>) of each test sample obtained from replicates*  
211 *of each participant applying the RI-URBANS DTT SOP*

| <b>Participant</b> | <b>SP1_Mean</b> | <b>SP1_SD</b> | <b>SP2_Mean</b> | <b>SP2_SD</b> | <b>SP3_Mean</b> | <b>SP3_SD</b> |
|--------------------|-----------------|---------------|-----------------|---------------|-----------------|---------------|
| <b>L1</b>          | 0.468           | 0.888         | 0.303           | 0.112         | 0.363           | 0.092         |
| <b>L2</b>          | 0.691           | 0.078         | 0.172           | 0.012         | 0.106           | 0.006         |
| <b>L3</b>          | --              | --            | --              | --            | --              | --            |
| <b>L4</b>          | 0.373           | 0.087         | 0.161           | 0.019         | 0.061           | 0.006         |
| <b>L5</b>          | --              | --            | --              | --            | --              | --            |
| <b>L6</b>          | 0.603           | 0.109         | 0.338           | 0.013         | 0.152           | 0.014         |
| <b>L7</b>          | 0.223           | 0.059         | 0.078           | 0.019         | 0.031           | 0.011         |
| <b>L8</b>          | 0.452           | 0.020         | 0.177           | 0.032         | 0.066           | 0.016         |
| <b>L9</b>          | 0.267           | 0.016         | 0.079           | 0.026         | 0.047           | 0.008         |
| <b>L10</b>         | 0.770           | 0.050         | 0.464           | 0.053         | 0.134           | 0.016         |
| <b>L11</b>         | 0.986           | 0.238         | 0.571           | 0.029         | 0.379           | 0.014         |
| <b>L12</b>         | 0.404           | 0.281         | 0.118           | 0.037         | 0.048           | 0.073         |
| <b>L13</b>         | 0.561           | 0.071         | 0.207           | 0.009         | 0.065           | 0.030         |
| <b>L14</b>         | 0.402           | 0.128         | 0.345           | 0.020         | 0.017           | 0.014         |
| <b>L15</b>         | 1.714           | 0.844         | 0.132           | 0.123         | 0.079           | 0.063         |
| <b>L16</b>         | --              | --            | --              | --            | --              | --            |
| <b>L17</b>         | 1.867           | 0.005         | 0.078           | 0.030         | 0.173           | 0.036         |
| <b>L18</b>         | 0.405           | 0.071         | 0.190           | 0.032         | 0.042           | 0.008         |
| <b>L19</b>         | 0.648           | 0.013         | 0.070           | 0.008         | 0.098           | 0.006         |
| <b>L20</b>         | 0.232           | 0.016         | 0.137           | 0.008         | 0.048           | 0.003         |
| <b>L21</b>         | 1.191           | 0.222         | 0.268           | 0.117         | 0.030           | 0.019         |

212

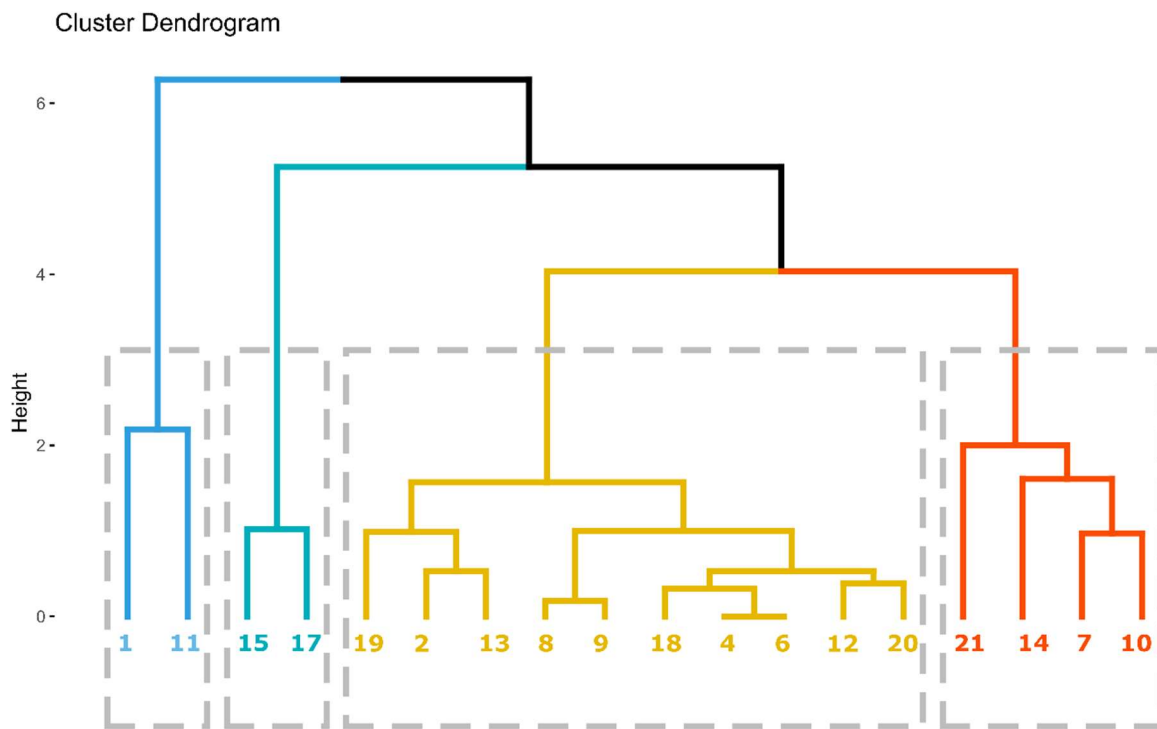

213  
 214 *Figure S8. Dendrogram of the hierarchical cluster analysis using the Ward method and applied to the results*  
 215 *reported from the simplified OP DTT RI-URBANS SOP.*

216  
 217  
 218 *Table S2. Variables and observations included in the multiple linear models used in this study. Delivery and*  
 219 *analysis time variables are not described here*

| Sample | Instrument          | Protocols                        |                                               |
|--------|---------------------|----------------------------------|-----------------------------------------------|
|        |                     | <i>M1 = RI-URBANS DTT</i><br>(n) | <i>M2 = RI-URBANS DTT + "home" DTT</i><br>(n) |
| SP1    | <i>Cuvette</i>      | 27                               | 36                                            |
|        | <i>Plate reader</i> | 24                               | 41                                            |
|        | <i>LWCC</i>         | 3                                | 11                                            |
| SP2    | <i>Cuvette</i>      | 27                               | 39                                            |
|        | <i>Plate reader</i> | 24                               | 44                                            |
|        | <i>LWCC</i>         | 3                                | 11                                            |
| SP3    | <i>Cuvette</i>      | 27                               | 39                                            |
|        | <i>Plate reader</i> | 24                               | 44                                            |
|        | <i>LWCC</i>         | 3                                | 12                                            |

220  
 221  
 222  
 223  
 224  
 225  
 226  
 227

228 *Table S3. Average and standard deviation (in nmol min<sup>-1</sup> μg<sup>-1</sup>) of each test sample obtained from replicates of*  
 229 *each participant applying DTT-“home” protocols*  
 230

| <b>Laboratory</b> | <b>SP1_Mean</b> | <b>SP1_SD</b> | <b>SP2_Mean</b> | <b>SP2_SD</b> | <b>SP3_Mean</b> | <b>SP3_SD</b> |
|-------------------|-----------------|---------------|-----------------|---------------|-----------------|---------------|
| <b>L1</b>         | 1.934           | 0.300         | 0.141           | 0.026         | 0.022           | 0.012         |
| <b>L2</b>         | 0.702           | 0.064         | 0.206           | 0.014         | 0.102           | 0.014         |
| <b>L3</b>         | 0.027           | 0.000         | 0.003           | 0.001         | 0.002           | 0.000         |
| <b>L4</b>         | --              | --            | --              | --            | --              | --            |
| <b>L5</b>         | --              | --            | --              | --            | --              | --            |
| <b>L6</b>         | 0.350           | 0.003         | 0.269           | 0.002         | 0.088           | 0.001         |
| <b>L7</b>         | 0.721           | 0.208         | 0.721           | 0.092         | 0.040           | 0.001         |
| <b>L8</b>         | --              | --            | --              | --            | --              | --            |
| <b>L9</b>         | --              | --            | --              | --            | --              | --            |
| <b>L10</b>        | 0.885           | 0.015         | 0.519           | 0.022         | 0.036           | 0.004         |
| <b>L11</b>        | 1.747           | 0.232         | 0.239           | 0.041         | 0.055           | 0.015         |
| <b>L12</b>        | 1.327           | 0.219         | 0.156           | 0.012         | 0.110           | 0.009         |
| <b>L13</b>        | 1.452           | 0.092         | 0.078           | 0.002         | 0.016           | 0.001         |
| <b>L14</b>        | --              | --            | 0.123           | 0.006         | 0.059           | 0.008         |
| <b>L15</b>        | --              | --            | --              | --            | --              | --            |
| <b>L16</b>        | --              | --            | --              | --            | --              | --            |
| <b>L17</b>        | --              | --            | 0.081           | 0.023         | 0.023           | 0.009         |
| <b>L18</b>        | --              | --            | --              | --            | --              | --            |
| <b>L19</b>        | 3.677           | 0.346         | 0.501           | 0.036         | 0.247           | 0.024         |
| <b>L20</b>        | 0.814           | 0.077         | 0.111           | 0.008         | 0.055           | 0.005         |
| <b>L21</b>        | --              | --            | --              | --            | --              | --            |

231

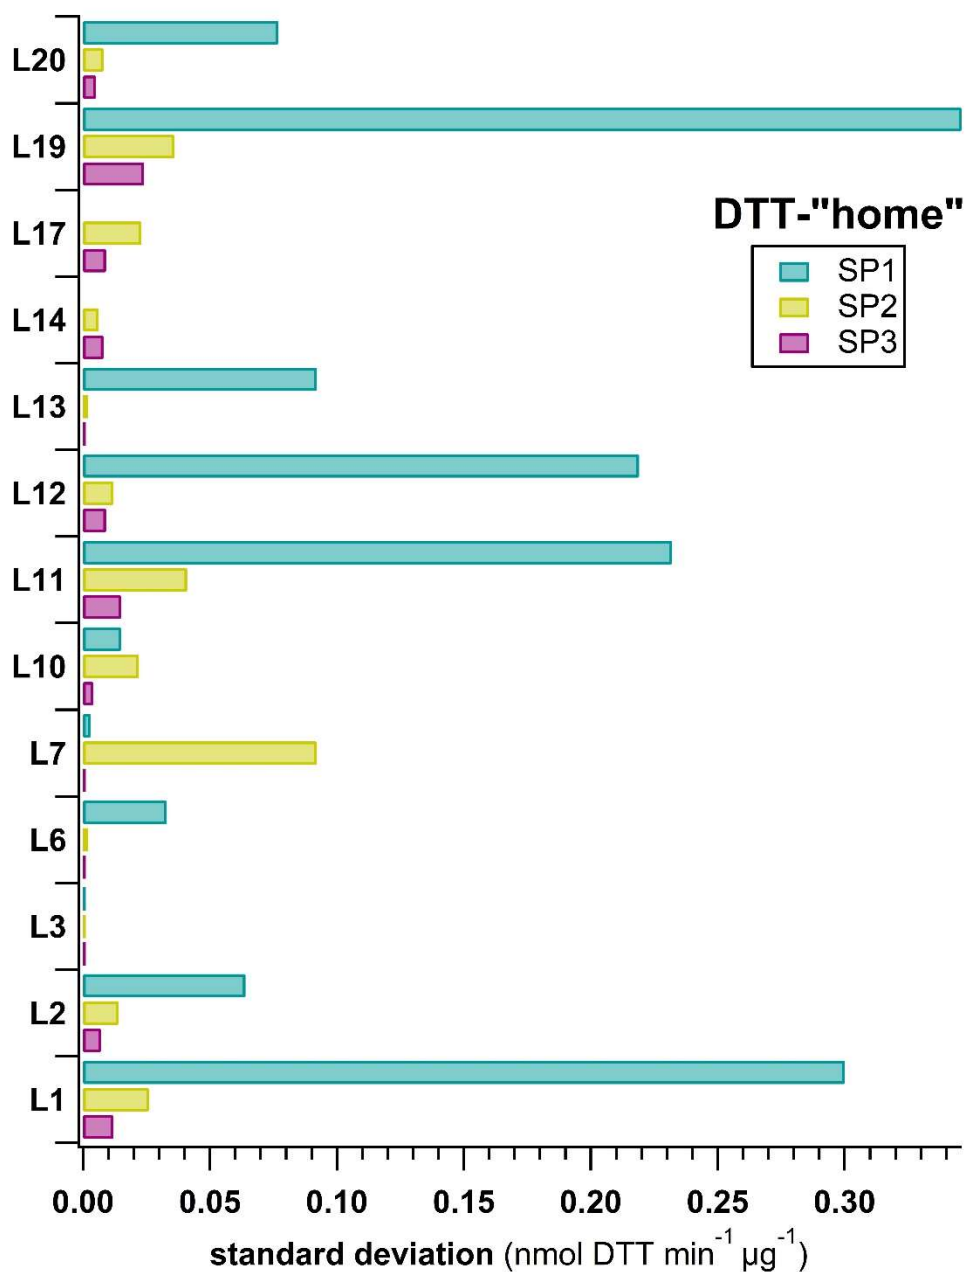

232  
 233 *Figure S9. Standard deviation on the replicates reported for each test sample using the DTT-“home” protocols,*  
 234 *grouped by participant reference number.*  
 235  
 236  
 237

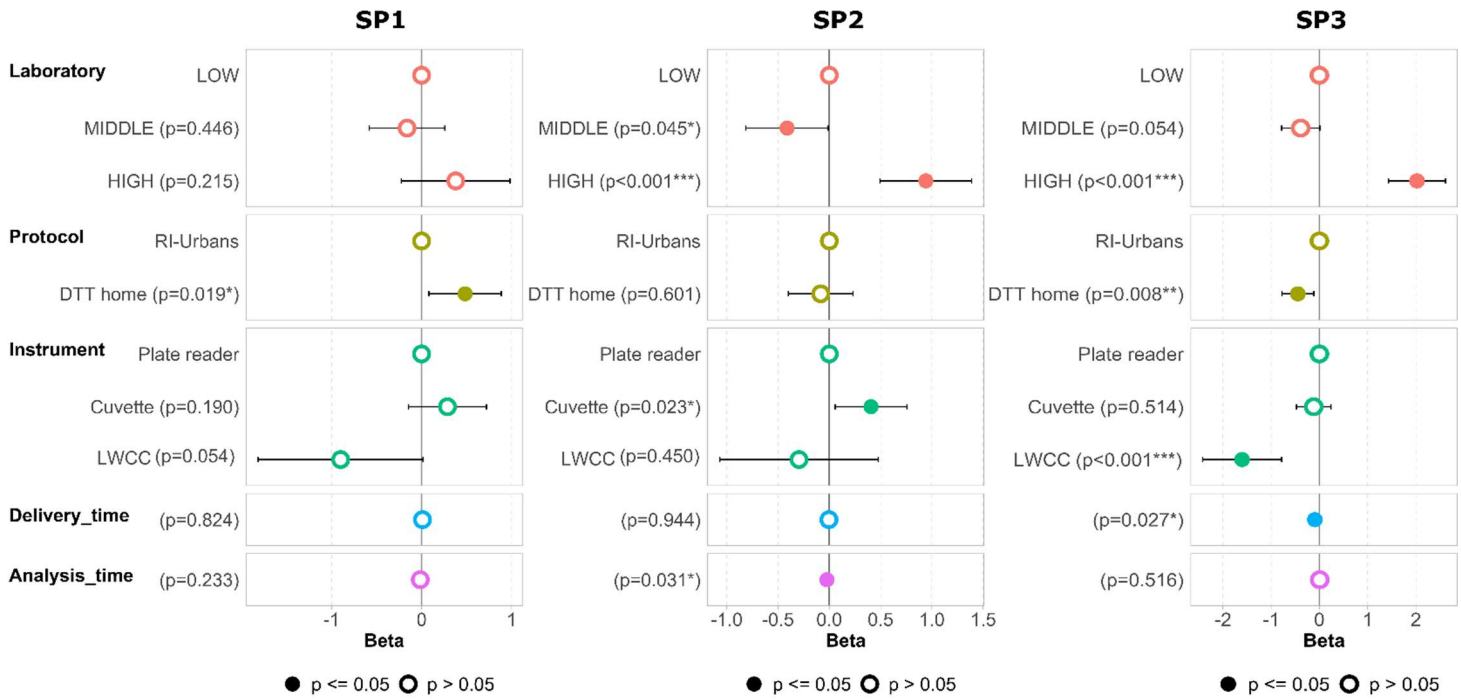

238  
239

240 Figure S10. Associations (betas in  $\text{nmol min}^{-1} \mu\text{g}^{-1}$ ) between OP DTT values for SP1, SP2 and SP3 for categorical  
 241 classification considering the performances of each laboratory grouped into low ( $0 < |z| < 2$ ), middle ( $2 < |z| < 3$ ) and high  
 242 ( $|z| > 3$ ) z-scores. The model includes the different parameters of the intercomparison, including the DTT protocol used,  
 243 the instrument used and the delivery and analysis time obtained by applying a multiple linear regression model.  
 244

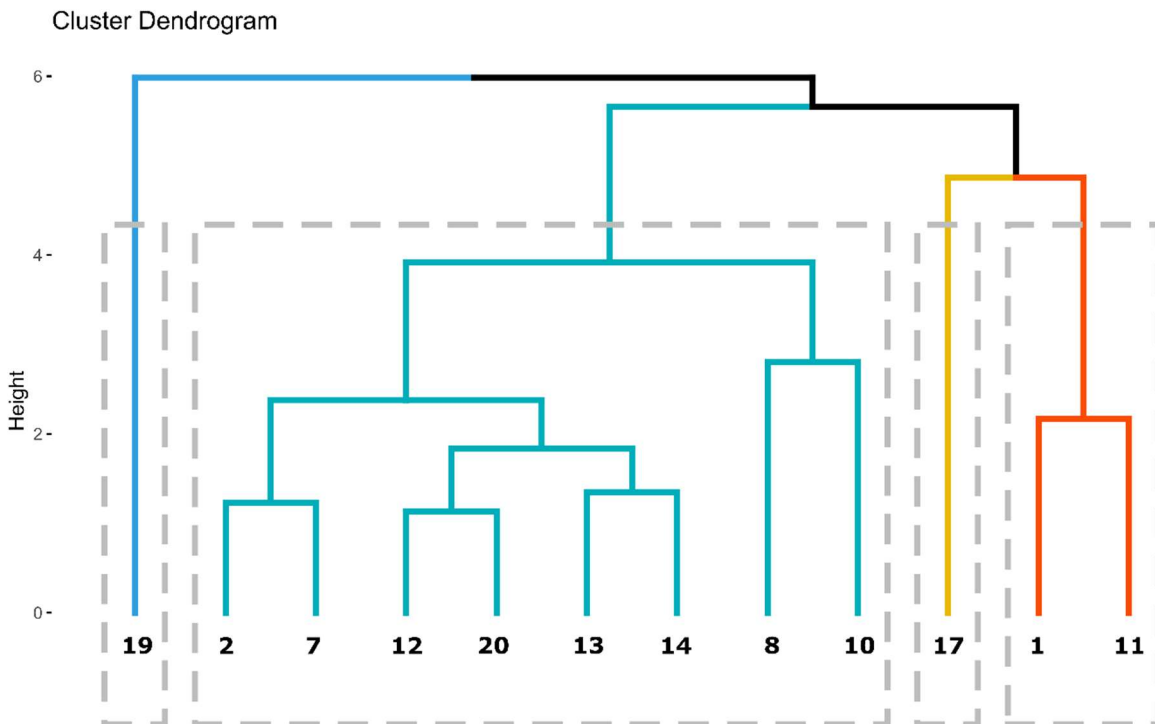

245  
 246 Figure S11. Dendrogram of hierarchical cluster analysis using the results from the groups reporting results of the  
 247 simplified OP DTT RI-URBANS and DTT "home" protocols (include only the participants that reported results for  
 248 the two protocols)  
 249

250  
251

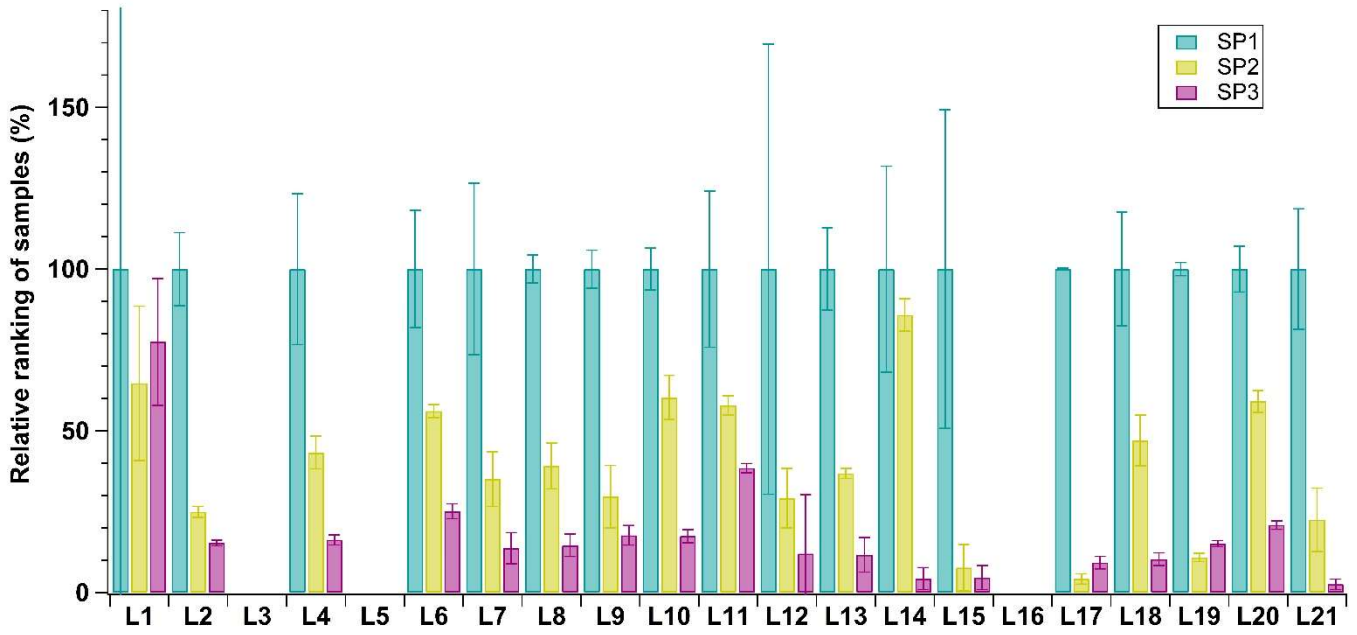

252  
253 *Figure S12. Relative average ranking and standard deviation of the samples evaluated in this ILC, considering*  
254 *SP1 as the reference one (100%).*

255
